# Supplementary material for: Prediction of hepatocellular carcinoma prognosis based on expression of an immune-related gene set
Source: publisher site journal article supplement (doi:10.18632/aging.102669), 2020-01-12
Supplement: Supplementary file [file aging-v12i1-102669-supplementary-material-SD1.pdf]

## Supplementary Figure

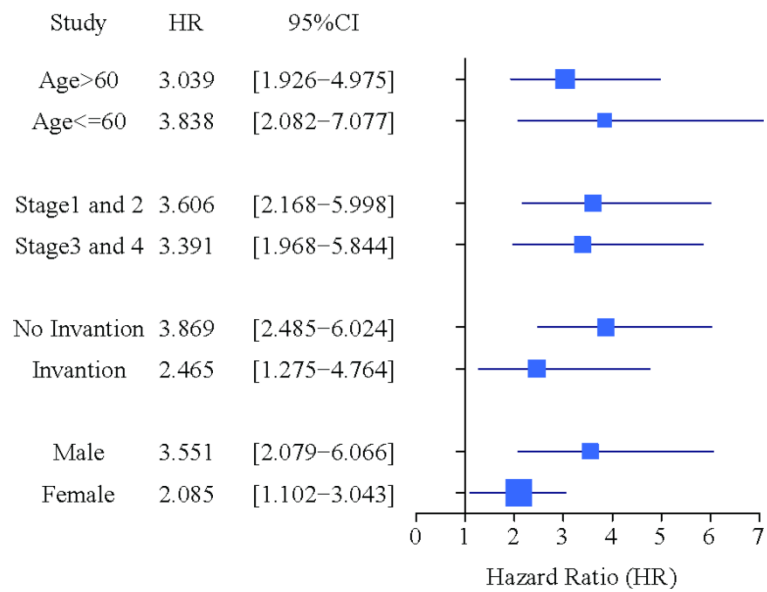

**Supplementary Figure 1. Subgroup and sensitivity analysis for IPSHCC.** We analyzed sensitivity according to age, gender, stage, and invasion to explore model stability for different clinical subgroups. IPSHCC was significant for all subgroups.
